# Supplementary material for: Supramolecular Photothermal Nanomedicine Mediated Distant Tumor Inhibition via PD-1 and TIM-3 Blockage
Source: PubMed Central journal article supplement (PMC7034522; doi:10.3389/fchem.2020.00001), 2020-02-14
Supplement: Data_Sheet_1.pdf [file Data_Sheet_1.pdf]

## *Supplementary Material*

**Table 1.** Optimization of ICG-Liposome with different formulations. N=3 in each group. Data are presented as means  $\pm$  SD.

| Formulations | Weight ratio of (DPPC / CHOL / DSPE-PEG) | ICG/lipid weight ratio | Liposome diameter (nm $\pm$ SD) | PdI               | ICG loading efficiency (%) |
|--------------|------------------------------------------|------------------------|---------------------------------|-------------------|----------------------------|
| A            | 5:3:1                                    | 1:5                    | 154.4 $\pm$ 2.6                 | 0.349 $\pm$ 0.047 | 7.6 $\pm$ 0.4              |
| B            | 5:3:1                                    | 1:10                   | 165.9 $\pm$ 2.8                 | 0.275 $\pm$ 0.004 | 6.7 $\pm$ 0.2              |
| C            | 6:2:1                                    | 1:5                    | 82.8 $\pm$ 1.9                  | 0.228 $\pm$ 0.009 | 8.6 $\pm$ 0.4              |
| D            | 6:2:1                                    | 1:10                   | 136.6 $\pm$ 0.8                 | 0.332 $\pm$ 0.005 | 8.0 $\pm$ 0.4              |
| E            | 6:3:1                                    | 1:5                    | 90.7 $\pm$ 3.2                  | 0.194 $\pm$ 0.018 | 8.2 $\pm$ 0.3              |
| F            | 6:3:1                                    | 1:10                   | 121.4 $\pm$ 1.2                 | 0.254 $\pm$ 0.008 | 9.1 $\pm$ 0.2              |

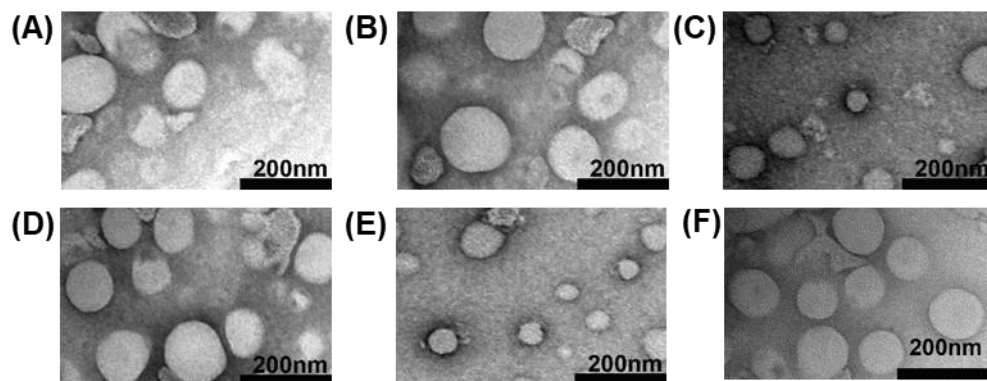

**Supplementary Figure 1.** TEM image of Liposome-ICG Formulation A (A), B (B), C (C), D (D), E (E), and F (F).

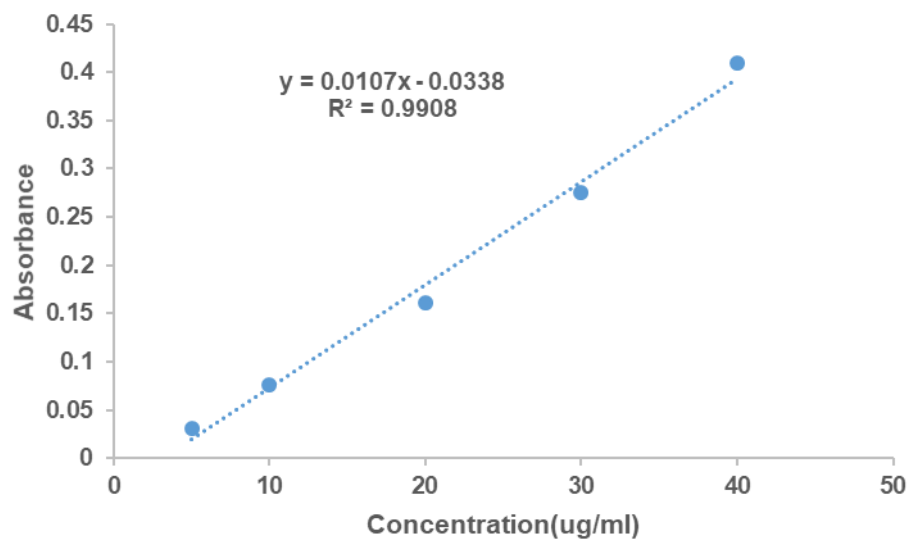

**Supplementary Figure 2.** The absorbance at 810 nm was measured on a UV-Vis/NIR spectrophotometer and standard curve of ICG concentration was obtained.

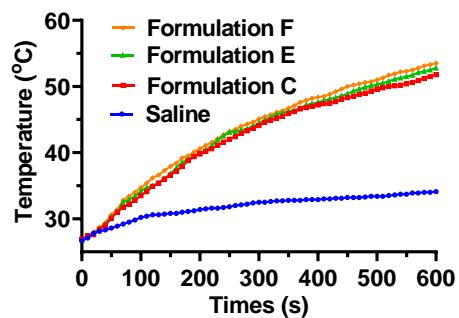

**Supplementary Figure 3.** Temperature curves of Saline, Formulation C, E and F (ICG-Liposome at same ICG concentrations of 80  $\mu\text{g}/\text{mL}$ ) under the 808 nm light irradiation ( $2 \text{ W}/\text{cm}^2$ , 10 min).

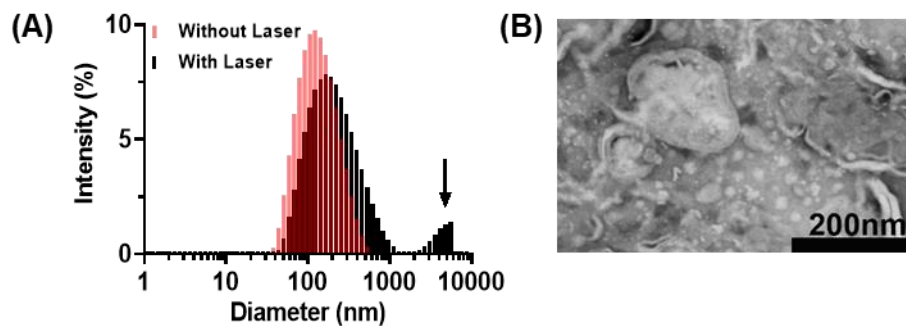

**Supplementary Figure 4.** (A) Hydrodynamic diameter of Formulation F without or with laser irradiation (808 nm  $2\text{W}/\text{cm}^2$ , 10 min). (B) TEM image of Formulation F with laser irradiation (808 nm  $2\text{W}/\text{cm}^2$ , 10 min).

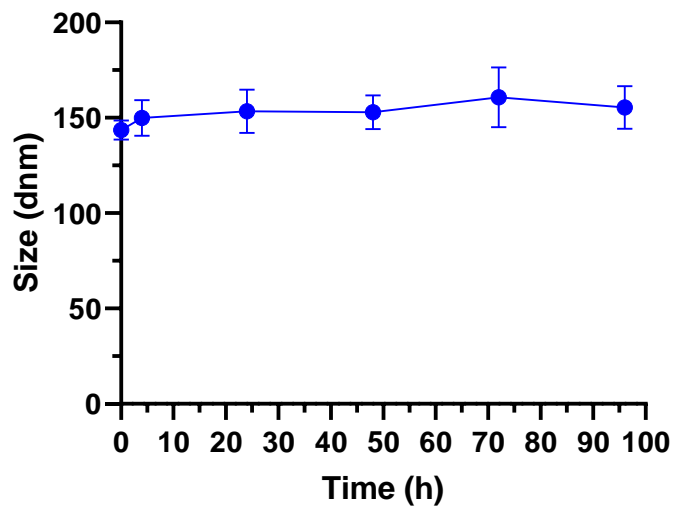

**Supplementary Figure 5.** Stability of the Liposome-ICG incubated in PBS with 10% FBS; data are represented as mean  $\pm$ SD (n= 3).

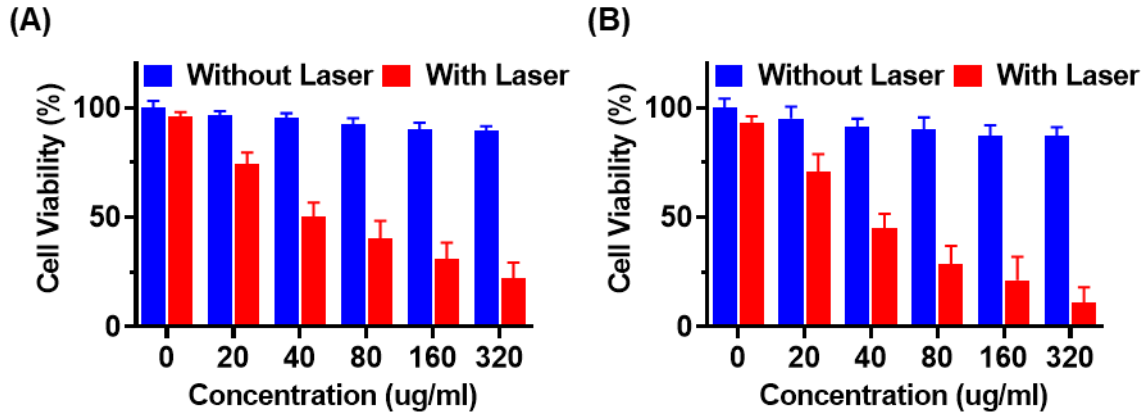

**Supplementary Figure 6.** The cell-killing effect of CT-26 cells (A) and HEK-293 cells (B) incubated with Liposome-ICG of different concentration with or without NIR laser irradiation (808 nm, 2 W/cm<sup>2</sup>, 10 min, n=4).

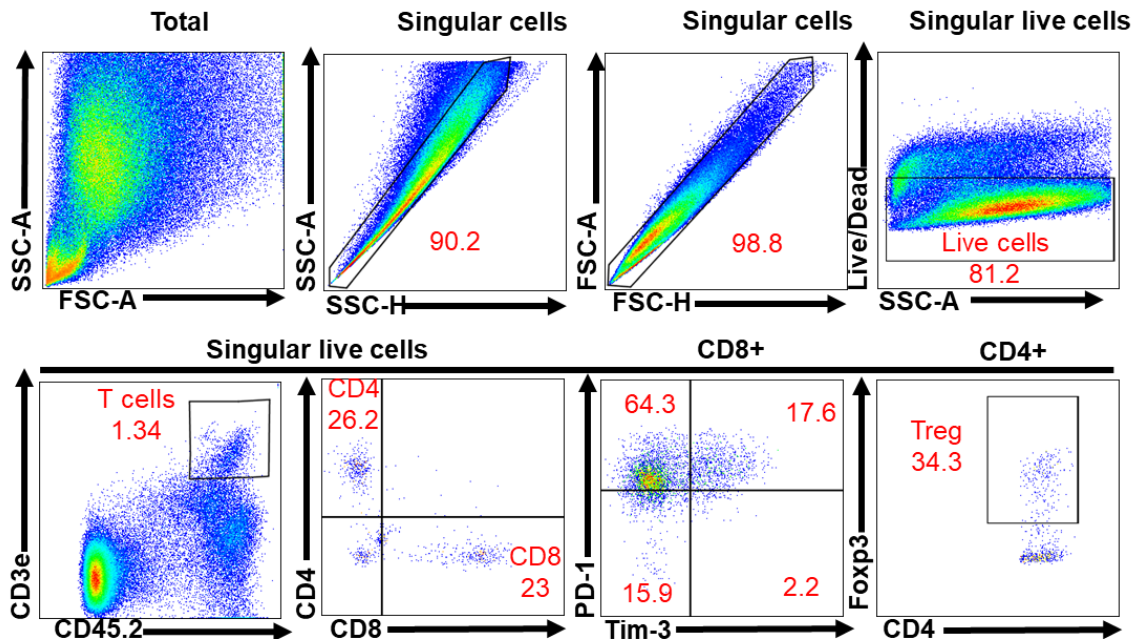

**Supplementary Figure 7.** Gating strategy for flow cytometry analysis of living singular cells (Live/dead<sup>-</sup>), T cells (CD45.2<sup>+</sup>CD3e<sup>+</sup>), CD4 T cells (CD4<sup>+</sup>), CD8 T cells (CD8<sup>+</sup>), PD-1 and Time-3 expression in CD8 T cells, and Tregs (CD4<sup>+</sup>Foxp3<sup>+</sup>) in MC-38 tumor from C57BL/6 mice.

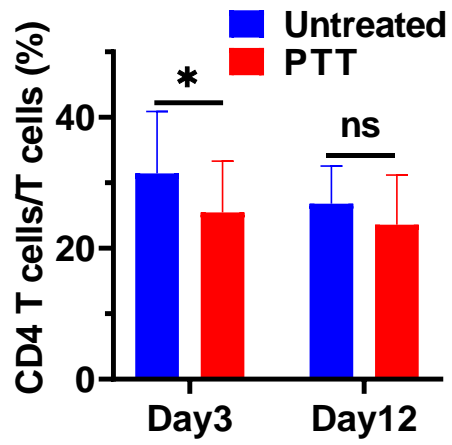

**Supplementary Figure 8.** Flow cytometry results showing the percentage of CD4<sup>+</sup> T cells on days 3 and 12 after PTT in distal MC-38 tumors. N=5 in each group. Data are presented as means  $\pm$  SEM. Statistical significance was calculated by Student's t-test: \*\*\* P < 0.001, \*\*P < 0.01, \*P < 0.05.
